# Supplementary material
Source: MDPI journal article supplement (https://www.mdpi.com/2073-4433/14/11/1655)
Supplement: s1 [file s1 › atmosphere-2656948-supplementary.pdf]

# Modeling Lightning Activity in the Third Pole Region: Performance of a km-Scale ICON-CLM Simulation

Prashant Singh \* and Bodo Ahrens

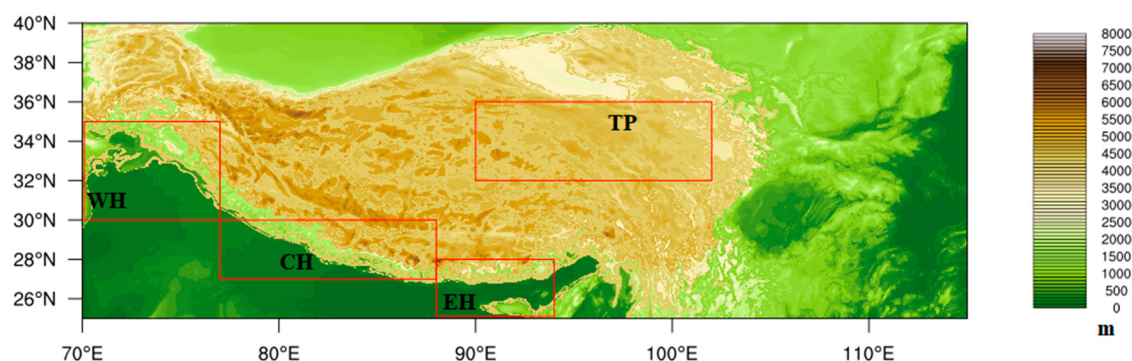

**Figure S1.** Orography of the study domains, red boxes are the area analysed in detail.

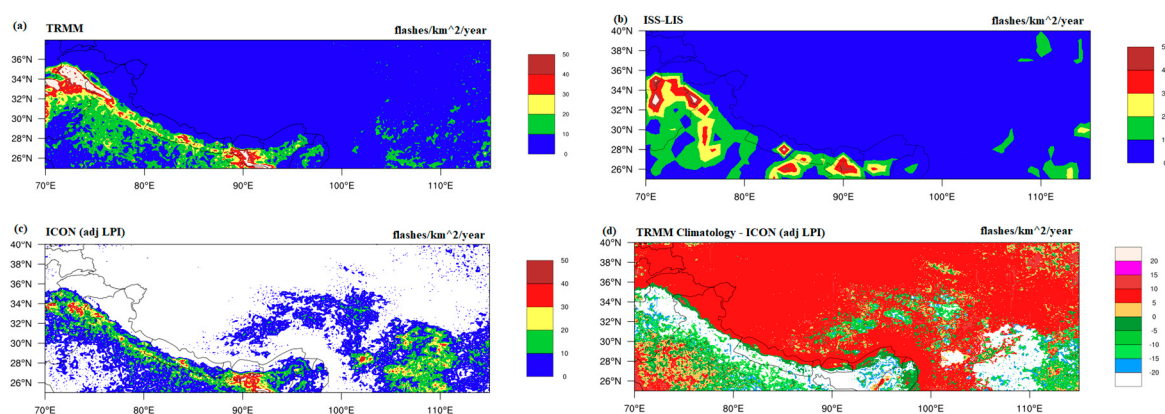

**Figure S2.** Annual average value of a) TRMM climatology, b) ISS-LIS observed data mapped on  $1^\circ \times 1^\circ$  grid, c) adjusted LPI, d) difference between climatology and adjusted LPI.

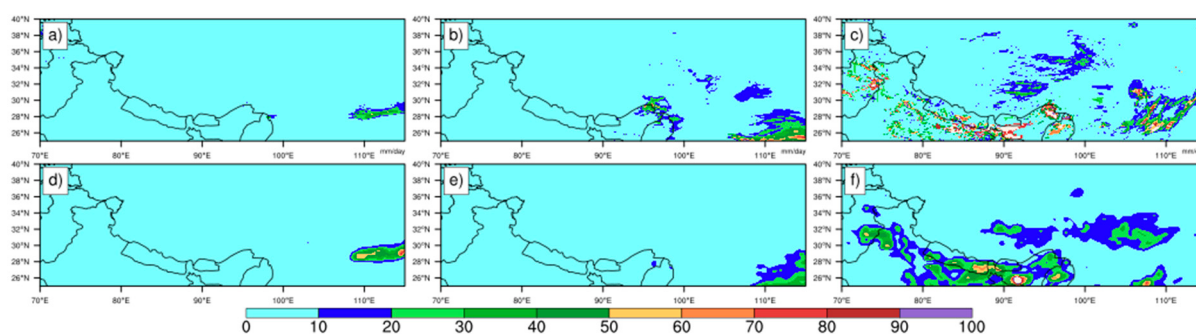

**Figure S3.** a), b), c) ICON simulated, and d), e), f) observed precipitation per day for the respective events discussed in Figure 7.

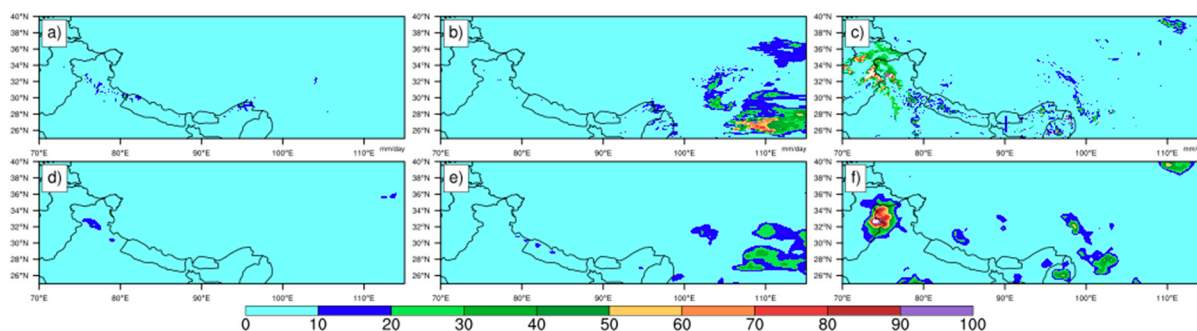

**Figure S4.** a), b), c) ICON simulated, and d), e), f) observed precipitation per day for the respective events discussed in Figure 8.

**Table S1.** Monthly regression coefficient for different domain with respect to observed lightning, climatology, and simulation.

|        | Monthly     | Observation | Model |
|--------|-------------|-------------|-------|
| TP     | Climatology | 0.91        | 0.96  |
|        | Observation | 1           | 0.94  |
| WH     | Climatology | 0.84        | 0.91  |
|        | Observation | 1           | 0.85  |
| CH     | Climatology | 0.72        | 0.81  |
|        | Observation | 1           | 0.62  |
| EH     | Climatology | 0.91        | 0.85  |
|        | Observation | 1           | 0.77  |
| Domain | Climatology | 0.93        | 0.90  |
|        | Observation | 1           | 0.72  |

**Table S2.** Diurnal regression coefficient for different domain with respect to observed lightning, climatology, and simulation.

|        | Diurnal     | Observation | Model |
|--------|-------------|-------------|-------|
| TP     | Climatology | 0.13        | 0.14  |
|        | Observation | 1           | 0.84  |
| WH     | Climatology | 0.58        | 0.80  |
|        | Observation | 1           | 0.74  |
| CH     | Climatology | 0.65        | 0.62  |
|        | Observation | 1           | 0.82  |
| EH     | Climatology | 0.56        | 0.89  |
|        | Observation | 1           | 0.70  |
| Domain | Climatology | 0.26        | 0.89  |
|        | Observation | 1           | 0.25  |
